# Supplementary material
Source: publisher site journal article supplement (https://www.dovepress.com/article/220075)
Supplement: Supplementary file 1 [file get_supplementary_file.php]

**Table S1 Demographic characteristics of subjects by MVPA**†

|  |  | Male (d/w) (N = 6765) | | | |  | Female (d/w) (N = 6584) | | | |
| --- | --- | --- | --- | --- | --- | --- | --- | --- | --- | --- |
| Total  (n = 13349) | 0  (n = 2236) | 1-3  (n = 2842) | 4-7  (n = 1687) | *p* |  | 0  (n = 3224) | 1-3  (n = 2425) | 4-7  (n = 935) | *p* |
| Age(M±SD) | 15.18±1.90 | 15.78±1.82 | 15.06±1.86 | 14.58±1.75 | <0.001 |  | 15.91±1.76 | 14.54±1.83 | 14.20±1.59 | <0.001 |
| Junior grade ‡, N (%) | 6836 (50.1) | 697 (31.2) | 1549 (54.5) | 1231 (73.0) | <0.001 |  | 824 (25.6) | 1611(66.4) | 789 (84.4) | <0.001 |
| BMI(M±SD) | 19.61±3.35 | 20.24±3.69 | 20.00±3.63 | 19.95±3.66 | 0.028 |  | 19.48±2.83 | 18.87±3.00 | 18.52±2.77 | <0.001 |
| SES¶(M±SD) | 6.13±1.64 | 5.85±1.67 | 6.17±1.63 | 6.44±1.68 | <0.001 |  | 5.92±1.56 | 6.21±1.58 | 6.56±1.65 | <0.001 |
| television time (h/school day), N (%) | | | | | | | | | | |
| 0 | 7869 (58.6) | 1349 (60.4) | 1394 (49.2) | 836 (49.6) | <0.001 |  | 2182 (67.8) | 1454 (60.0) | 594 (63.6) | <0.001 |
| ≤1 | 3903 (29.1) | 617 (27.6) | 1029 (36.3) | 553 (32.8) |  |  | 742 (23.1) | 710 (29.3) | 230 (24.6) |  |
| >1 to ≤2 | 935 (7.0) | 142 (6.4) | 265 (9.3) | 136 (8.1) |  |  | 161 (5.0) | 166 (6.9) | 61 (6.5) |  |
| >2 | 710 (5.3) | 124 (5.6) | 148 (5.2) | 161 (9.5) |  | 133 (4.1) | 92 (3.8) | 49 (5.2) |
| Game/computer use time (h/school day), N(%) | | | | | | | | | | |
| 0 | 9290 (70.2) | 1491 (67.6) | 1834 (65.7) | 1060 (64.8) | 0.011 |  | 2418 (75.7) | 1705 (71.4) | 714 (77.9) | <0.001 |
| ≤1 | 2440 (18.4) | 407 (18.5) | 589 (21.1) | 324 (19.8) |  | 513 (16.1) | 473 (19.8) | 120 (13.1) |
| >1 to ≤2 | 761 (5.8) | 142 (6.4) | 191 (6.8) | 104 (6.4) |  | 135 (4.2) | 137 (5.7) | 47 (5.1) |
| >2 | 736 (5.4) | 164 (7.4) | 178 (6.4) | 149 (9.1) |  | 130 (4.1) | 74 (3.1) | 35 (3.8) |

MVPA, moderate and vigorous physical activity; BMI, body mass index; ‡Junior grade indicates 7th–9th grade; ¶ SES, subjective economic status, was considered as continuous variables (ranging from 1-the worst, to 10-the best); †Percentages do not always equal 100 because of rounding. Values may not always sum to sample size because of missing data;

**Table S2 Demographic characteristics of subjects by game/computer use time**†

|  |  | Male (h/school day) | | | | |  |  | Female (h/school day) | | | | |
| --- | --- | --- | --- | --- | --- | --- | --- | --- | --- | --- | --- | --- | --- |
| Total  (n = 6653) | 0  (n=4399) | ≤1  (n=1322) | >1 to ≤2  (n=438) | >2  (n=494) | *p* |  | Total  (n = 6525) | 0  (n=4855) | ≤1  (n=1111) | >1 to ≤2  (n=319) | >2  (n=240) | *p* |
| Age(M±SD) | 15.1±1.8 | 15.2±1.9） | 15.2±1.8 | 15.2±1.7 | 15.1±1.8 | 0.618 |  | 15.2±1.8 | 15.2±1.9 | 15.2±1.9 | 14.9±1.8 | 15.0±1.7 | 0.045 |
| Junior grade ‡, N (%) | 3365（50.6） | 2235（50.8） | 650（49.2） | 224（51.1） | 256（51.8） | 0.681 |  | 3164（48.5） | 2351（48.4） | 528（47.5） | 169（53.0） | 116（48.3） | 0.392 |
| BMI(M±SD) | 20.1±3.7 | 21.1±3.6 | 20.1±3.7 | 20.2±3.9 | 20.0±3.9 | 0.892 |  | 19.1±2.9 | 19.1±2.9 | 19.1±2.9 | 19.1±2.8 | 19.1±3.0 | 0.996 |
| SES¶(M±SD) | 6.1±1.7 | 6.1±1.7 | 6.2±1.6 | 6.0±1.7 | 6.1±1.7 | 0.051 |  | 6.1±1.6 | 6.1±1.6 | 6.1±1.5 | 6.2±1.6 | 6.1±1.7 | 0.807 |
| MVPA（d/w）, N (%) | | | | | | | | | | | | | |
| 0 | 2204（33.2） | 1491（34.0） | 407（30.8） | 142（32.5） | 164（33.4） | <0.011 |  | 3196（49.2） | 2418（75.7） | 513（46.4） | 135（42.3） | 130（54.4） | <0.001 |
| 1-3 | 2792（42.1） | 1834（41.8） | 589（44.6） | 191（43.7） | 178（36.3） |  |  | 2389（36.7） | 1705（35.2） | 473（42.8） | 137（42.9） | 74（31.0） |  |
| 4-7 | 1637（24.7） | 1060（24.2） | 324（24.5） | 104（23.8） | 149（30.3） |  |  | 916（14.1） | 714（14.8） | 120（10.8） | 47（14.7） | 35（14.6） |  |

MVPA, moderate and vigorous physical activity; BMI, body mass index; ‡Junior grade indicates 7th–9th grade; ¶ SES, subjective economic status, was considered as continuous variables (ranging from 1-the worst, to 10-the best); †Percentages do not always equal 100 because of rounding. Values may not always sum to sample size because of missing data

**Table S3. Demographic characteristics of subjects by television time**†

|  |  | Male (h/school day) | | | | |  |  | Female (h/school day) | | | | |
| --- | --- | --- | --- | --- | --- | --- | --- | --- | --- | --- | --- | --- | --- |
| Total  (n = 6772) | 0  (n = 3588) | ≤1  (n = 2204) | >1 to ≤2  (n= 545) | >2  (n = 435) | *p* |  | Total  (n = 6597) | 0  (n = 4243) | ≤1  (n = 1691) | >1 to ≤2  (n = 388) | >2  (n =275) | *p* |
| Age(M±SD) | 15.2±1.9 | 15.3±1.9 | 15.1±1.8 | 14.9±1.8 | 15.0±1.7 | <0.001 |  | 15.2±1.9 | 15.3±1.9 | 15.1±1.9 | 14.6±1.8 | 14.9±4.8 | <0.001 |
| Junior grade ‡, N (%) | 3481 ( 51.4) | 1719 (47.9) | 1185 (53.8) | 333 (61.1) | 244 (56.1) | <0.001 |  | 3235 (49.0) | 1974 (46.5) | 871 (51.5) | 241 (62.1) | 149 (54.2) | <0.001 |
| BMI(M±SD) | 20.1±3.7 | 20.0±3.6 | 20.2±3.7 | 20.1±3.9 | 20.0±3.9 | 0.217 |  | 19.0±2.9 | 19.1±2.8 | 19.2±3.0 | 19.0±3.1 | 19.1±3.2 | 0.804 |
| SES¶(M±SD) | 6.1±1.7 | 6.1±1.7 | 6.2±1.6 | 6.1±1.6 | 6.1±1.8 | 0.054 |  | 6.1±1.6 | 6.1±1.6 | 6.1±1.5 | 6.0±1.6 | 6.0±1.7 | 0.235 |
| MVPA（d/w）, N (%) | | | | | | | | | | | | | |
| 0 | 2232 (33.0) | 1349 (37.7) | 617 (28.1) | 142 (26.2) | 124 (28.6) | <0.001 |  | 3218 (49.0) | 2182 (51.6) | 742 (44.1) | 161 (41.5) | 133 (48.5) | <0.001 |
| 1-3 | 2836 (42.0) | 1394 (38.9) | 1029 (46.8) | 265 (48.8) | 148 (34.2) |  |  | 2422 (36.8) | 1454 (34.4) | 710 (42.2) | 166 (42.8) | 92 (33.6) |  |
| 4-7 | 1686 (25.0) | 836 (23.4) | 553 (25.1) | 136 (25.0) | 161 (37.2) |  |  | 934 (14.2) | 594 (14.0) | 230 (13.7) | 61 (15.7) | 49 (17.9) |  |

MVPA, moderate and vigorous physical activity; BMI, body mass index; ‡Junior grade indicates 7th–9th grade; ¶ SES, subjective economic status, was considered as continuous variables (ranging from 1-the worst, to 10-the best); †Percentages do not always equal 100 because of rounding. Values may not always sum to sample size because of missing data;

**Table S4. Parameters of fit in the latent class analysis**

| **Model** | **P** | **E** | **AIC** | **BIC** | **aBIC** | **VLMR-LRT *p* value** | **BLRT**  ***p* value** | **Proportions for class based on estimated posterior probabilities** | | | | |
| --- | --- | --- | --- | --- | --- | --- | --- | --- | --- | --- | --- | --- |
| 1 | 2 | 3 | 4 | 5 |
| 1C | 8 | - | 77461.672 | 77521.553 | 77496.130 | - | - | - | - | - | - | - |
| 2C | 17 | 0.736 | 75625.181 | 75752.429 | 75698.405 |  | <0.0001 | 0.73041 | 0.26959 |  |  |  |
| 3C | 26 | 0.816 | 75170.371 | 75364.985 | 75282.360 | 0.0001 | <0.0001 | 0.06177 | 0.27589 | 0.66235 |  |  |
| 4 C* | 35 | 0.822 | 75119.732 | 75381.713 | 75270.486 | 0.0001 | 0.0001 | 0.26677 | 0.64699 | 0.04774 | 0.03850 |  |
| 5C |  | 0.575 | - | - | - | <0.0001 | <0.0001 | 0.03935 | 0.06133 | 0.21623 | 0.19804 | 0.48505 |

C=latent class, P=number of free parameter, E=entropy, AIC= Akaike information criterion, BIC=Bayesian information criterion, aBIC= adjusted Bayesian information criterion, VLMR-LRT = Vuong-Lo-Mendell-Rubin likelihood ratio test, BLRT = parametric bootstrapped likelihood ratio test. *Best fitting model.
